# Supplementary material
Source: PubMed Central journal article supplement (PMC2901549)
Supplement: NIHMS209443-supplement-suppl_table_Fig.pdf [file NIHMS209443-supplement-suppl_table_Fig.pdf]

**Supplemental Table 1.** Fatty acid composition (%) in lipid classes. Geno, genotype; SFA, saturated; MUFA, monounsaturated; PUFA, polyunsaturated; n3, n6, and n9, position of double bond in fatty acid; plas, plasmalogen; WT wild-type; KO, *Agpat6*<sup>-/-</sup>; N.D., not detectable. \*, *p* < 0.05 for *Agpat6*<sup>-/-</sup> vs. wild-type.

| Tissue | Lipid  | Geno | %SFA      | %MUFA     | %PUFA     | %n3       | %n6       | %n9       | %plas       |
|--------|--------|------|-----------|-----------|-----------|-----------|-----------|-----------|-------------|
| Plasma | DAG    | WT   | 54.5±3.7  | 20.5±1.2  | 22.4±3.8  | 4.1±0.8   | 17.8±2.6  | 16.8±0.7  | 2.5±1.2     |
| Plasma | DAG    | KO   | 56.0±0.4  | 22.2±2.5  | 19.3±1.4  | 4.3±0.4   | 14.8±1.7  | 17.2±3.3  | 2.5±0.8     |
| Plasma | TAG    | WT   | 27.6±1.5  | 32.9±1.3  | 39.1±0.9  | 5.5±0.1   | 33.4±0.8  | 26.8±0.4  | 0.38±0.23   |
| Plasma | TAG    | KO   | 30.0±3.6  | 28.4±0.5* | 41.1±3.4  | 6.3±0.8   | 34.3±3.5  | 235±1.1*  | 0.49±0.37   |
| Plasma | PC     | WT   | 45.5±1.8  | 11.5±0.4  | 42.8±1.4  | 6.9±0.4   | 35.8±1.8  | 9.2±0.3   | N.D.        |
| Plasma | PC     | KO   | 45.0±1.2  | 9.8±0.8*  | 42.8±1.4  | 8.5±0.6*  | 36.4±0.7  | 7.7±0.8*  | N.D.        |
| Plasma | LysoPC | WT   | 57.5±0.8  | 12.0±1.3  | 30.4±2.0  | 2.6±0.5   | 27.7±1.5  | 9.9±1.0   | 0.09±0.02   |
| Plasma | LysoPC | KO   | 58.8±2.7  | 11.0±0.2  | 30.1±2.9  | 3.3±0.5   | 26.7±2.8  | 8.8±0.4   | 0.10±0.02   |
| BAT    | DAG    | WT   | 38.6±2.8  | 38.0±3.7  | 21.6±1.1  | 4.0±0.9   | 17.6±1.4  | 30.1±1.9  | 1.7±0.5     |
| BAT    | DAG    | KO   | 38.2±1.4  | 33.8±1.0  | 27.0±2.2* | 1.9±0.3*  | 25.1±2.2* | 28.1±0.5  | 0.9±0.1     |
| BAT    | TAG    | WT   | 27.4±0.2  | 48.3±0.8  | 24.3±0.6  | 1.54±0.14 | 22.7±0.7  | 42.5±0.3  | 0.027±0.007 |
| BAT    | TAG    | KO   | 29.3±3.4  | 40.8±2.6* | 29.8±4.0  | 1.22±0.25 | 28.5±4.1  | 35.9±3.6* | 0.02±0.01   |
| BAT    | FFA    | WT   | 48.6±1.2  | 34.1±2.1  | 17.3±1.4  | 2.5±0.8   | 14.8±2.2  | 28.0±1.0  | N.D.        |
| BAT    | FFA    | KO   | 42.1±5.4* | 32.0±2.8  | 25.9±3.2* | 1.9±0.3   | 24.0±3.3* | 28.2±2.5  | N.D.        |
| BAT    | PC     | WT   | 33.3±1.1  | 18.1±1.0  | 47.5±2.1  | 10.6±1.4  | 36.9±3.4  | 15.2±0.4  | 1.09±0.04   |
| BAT    | PC     | KO   | 33.1±2.0  | 12.7±0.8* | 53.3±2.0* | 10.3±1.0  | 43.0±3.0  | 10.8±0.8* | 0.90±0.26   |
| Liver  | DAG    | WT   | 29.2±1.1  | 34.5±1.6  | 35.9±0.5  | 4.2±0.1   | 31.6±0.4  | 27.7±1.0  | 0.36±0.08   |
| Liver  | DAG    | KO   | 27.7±2.8  | 31.1±0.2* | 38.8±2.8  | 4.8±0.1*  | 33.9±2.9  | 25.3±1.2  | 0.28±0.19   |
| Liver  | TAG    | WT   | 25.3±0.8  | 37.4±0.5  | 37.2±0.2  | 4.5±0.2   | 32.6±0.4  | 30.2±0.5  | 0.12±0.19   |
| Liver  | TAG    | KO   | 25.9±3.1  | 33.8±1.2* | 40.3±2.7  | 5.0±0.56  | 35.2±3.28 | 27.7±1.84 | 0.01±0.01   |
| Liver  | PC     | WT   | 44.5±0.8  | 12.2±1.1  | 43.2±0.4  | 8.9±0.6   | 34.2±0.3  | 9.8±0.8   | 0.11±0.03   |
| Liver  | PC     | KO   | 44.8±1.4  | 10.2±0.9  | 44.9±0.9* | 10.9±0.8* | 33.9±1.7  | 7.9±1.0   | 0.11±0.02   |
| Liver  | LysoPC | WT   | 57.2±4.6  | 17.9±6.5  | 23.6±2.1  | 6.4±0.3   | 17.0±2.3  | 13.8±6.0  | 1.12±0.45   |
| Liver  | LysoPC | KO   | 59.6±2.9  | 17.8±1.3  | 21.7±2.4  | 4.9±1.1   | 16.5±3.2  | 15.7±1.4  | 0.41±0.30   |

## Supplemental Fig. 1

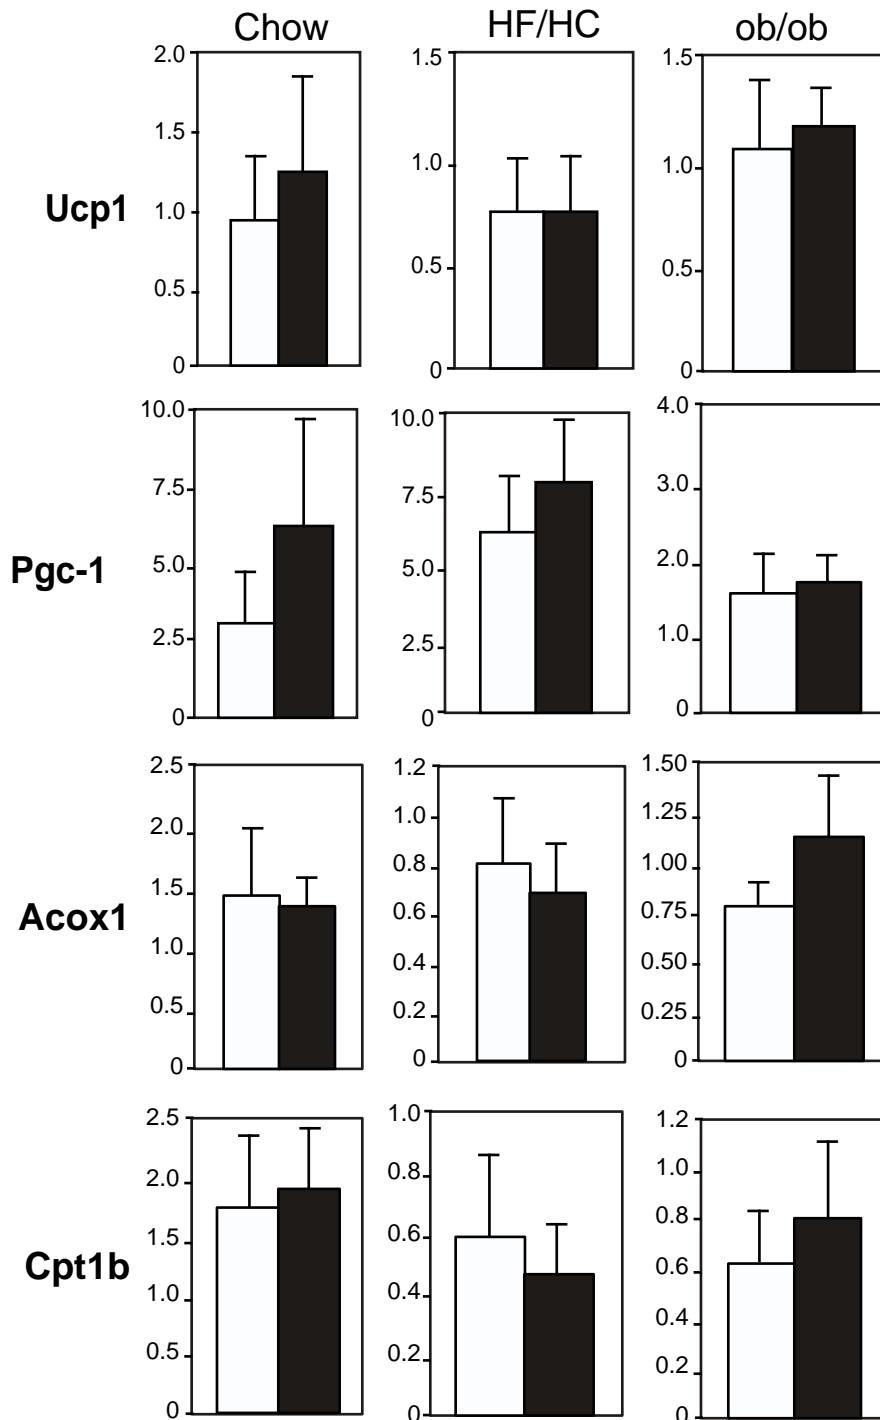

**Supplemental Fig. 1.** Gene expression in brown adipose tissue. Data were obtained from mice maintained on a chow diet, HF/HC diet, and ob/ob background using real-time PCR (n = 4 for each group). Values represent relative mRNA expression normalized as described in Methods. White and black bars represent wild-type and *Agpat6*<sup>-/-</sup>, respectively.
